# Supplementary material for: Core–shell nanotubes to enhance electrical bistability for 2-bit memory
Source: Royal Society of Chemistry journal article supplement (doi:10.1039/b807253a), 2008-01-01
Supplement: b807253a.pdf [file b807253a.pdf]

## Electronic Supplementary Information (ESI)

### Core-Shell Nanotubes to Enhance Electrical Bistability for 2-bit Memory

Batu Ghosh, Satyajit Sahu, and Amlan J. Pal\*

*Indian Association for the Cultivation of Science*

*Department of Solid State Physics and Centre for Advanced Materials*

*Kolkata 700032, India*

*E-mail: sspajp@iacs.res.in*

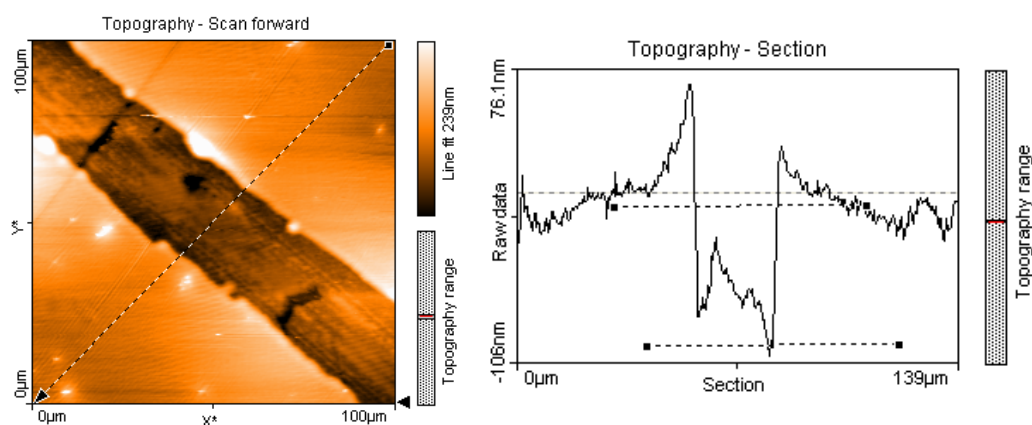

**Supporting Figure 1.** AFM topography of a scratched film (left figure) along with the depth profile of the scratch. The film that has been characterized is a spun-cast one based on CNT: CdS (2 mM) in PVP matrix.

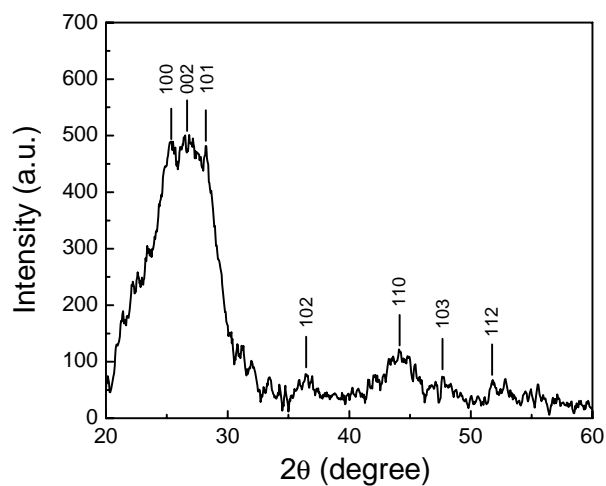

**Supporting Figure 2.** X-ray diffraction patterns of CNT:CdS core-shells showing crystalline planes of hexagonal CdS.

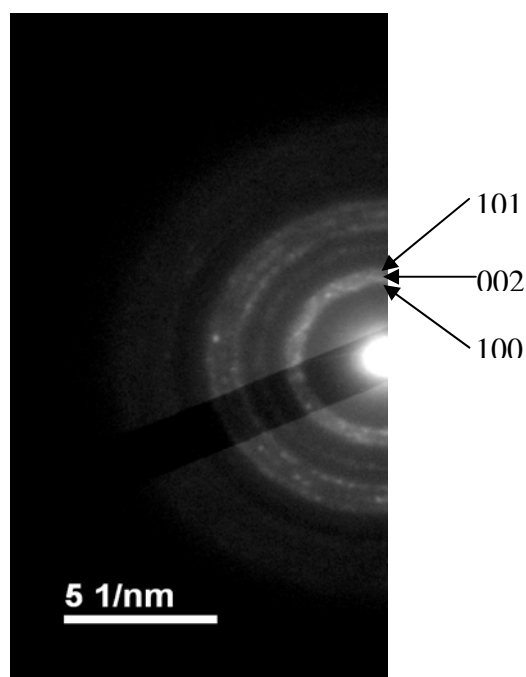

**Supporting Figure 3.** Selected Area Electron Diffraction (SAED) patterns of CNT:CdS core-shells. The lattice planes correspond to hexagonal structure of CdS (JCPDS No. 41-1049). Lattice parameters:  $a = 4.14 \text{ \AA}$ ,  $c = 6.71 \text{ \AA}$ .

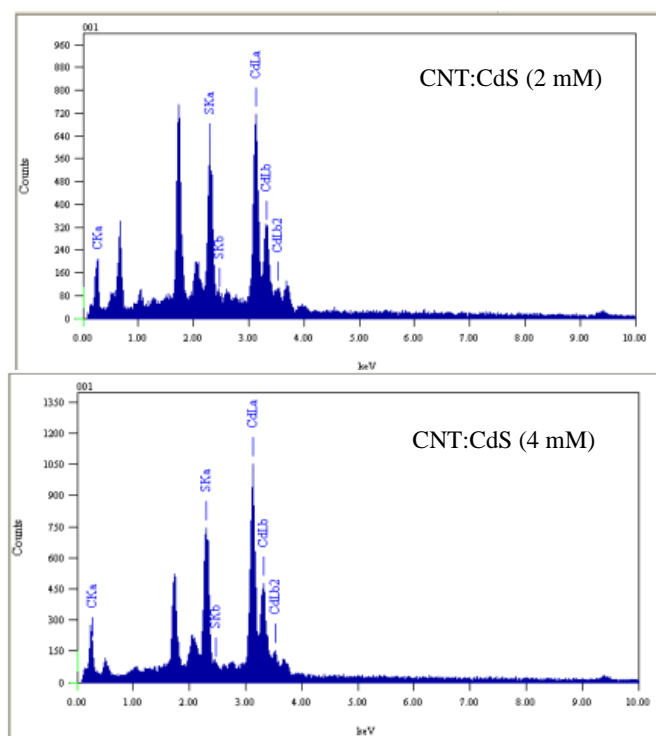

**Supporting Figure 4.** EDX analyses of CNT:CdS core-shells grown with different equimolar concentration of CdCl<sub>2</sub> and sulfur.

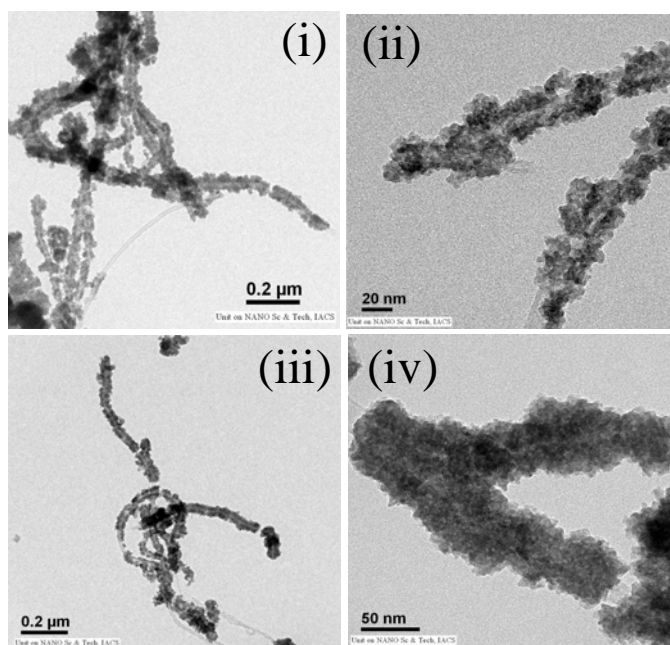

**Supporting Figure 5.** Additional TEM image CNT:CdS core-shells formed with 2 mM (i and ii) and 4 mM (iii and iv) of CdCl<sub>2</sub> and sulfur powder.

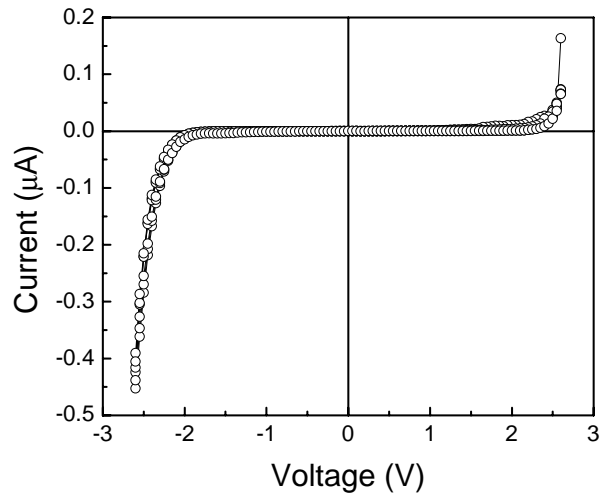

**Supporting Figure 6.** Current-voltage characteristics of a device based on PVP films with ITO and Al as electrodes. Characteristics under three voltage loops are presented in the figure.

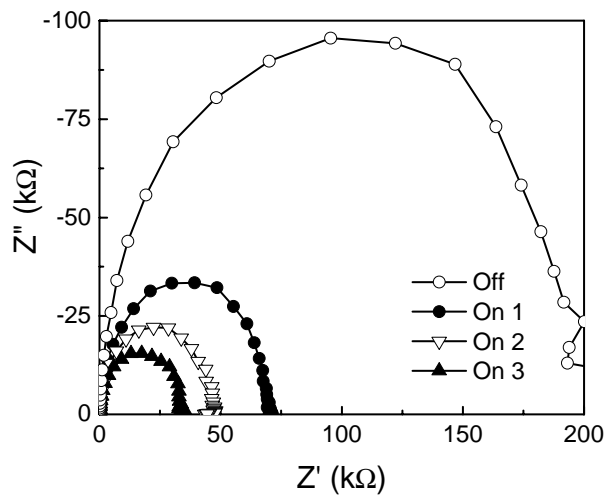

**Supporting Figure 7.** Cole-Cole plots. Here real and imaginary component of complex impedance ( $Z'$  and  $Z''$ , respectively) have been measured as a function of test frequency (100 mV, rms). Frequency-sweeps were carried out after application of +3.0, -2.6, -2.8, and -3.0 V pulse (width = 30 s) inducing the Off, On1, On2, and On3 states, respectively.
